# Supplementary material for: Systematic studies on the in vivo substance basis and the pharmacological mechanism of Acanthopanax Senticosus Harms leaves by UPLC-Q-TOF-MS coupled with a target-network method
Source: Royal Society of Chemistry journal article supplement (doi:10.1039/c8fo01645c), 2018-01-01
Supplement: c8fo01645c1.pdf [file c8fo01645c1.pdf]

## **Systematical studies on the in vivo substance basis and the pharmacology mechanism of *Acanthopanax Senticocus* Harms leaves by a PLC-Q-TOF-MS coupled with a target-network method**

Yu Wang<sup>b, c</sup>, Rongjin Wang<sup>b</sup>, Liqiang Shi<sup>b</sup>, Shu Liu<sup>a, \*</sup>, Zhongying Liu<sup>b, \*</sup>, Fengrui Song<sup>a</sup>, Zhiqiang Liu<sup>a</sup>

<sup>a</sup> *National Center of Mass Spectrometry in Changchun & Jilin Province Key Laboratory of Chinese Medicine Chemistry and Mass Spectrometry & Chemical Biology Laboratory, Changchun Institute of Applied Chemistry, Chinese Academy of Sciences, Changchun, 130022, China*

<sup>b</sup> *School of Pharmaceutical Sciences, Jilin University, Changchun 130021, China*

<sup>c</sup> *Experiment Center for Science and Technology, Shanghai University of Traditional Chinese Medicine, Shanghai, 201203, China*

\*Corresponding authors: Shu Liu

Changchun Institute of Applied Chemistry, Chinese Academy of Sciences, 5625 Renmin Street, Changchun 130022, Jilin, China.

Tel.: +86-431-85262613; Fax: +86-431-85262236

E-mail address: mslab20@ciac.ac.cn (S. Liu)

Description S1: 20kg dried ASL was extracted 2 times, for the first time, it was extracted under reflux in 240 L of 60% ethanol for 2 h, and second times, it was extracted under reflux in 200 L of 60% ethanol for 2 h. The decoctions were combined, and then concentrated in vacuum to 20 L at 60 °C and the final concentration of the obtained stock solution of ASL was 1 g / mL. 10L of the stock solution was separated and purified by the DM-130 macroporous resin, which was firstly eluted with 4BW distilled water, and then the active ASL sites was eluted with 4BW 40% ethanol at a speed of 2 BV/h, the eluent was collected and freeze-dried.

Table S1 Metabolic pathway settings

| Mass      | Formular     | Description                           |
|-----------|--------------|---------------------------------------|
| +2.0157   | +H2          | Reduction                             |
| +15.9949  | +O           | Hydroxylation                         |
| +18.0106  | +H2O         | Hydration                             |
| +14.0157  | +CH2         | Methylation                           |
| -2.0157   | -H2          | Desaturation                          |
| +1.9793   | -CH2+O       | Demethylation+hydroxylation           |
| +13.9793  | +O-H2        | Hydroxylation+desaturation            |
| -4.0313   | -H4          | Two sequential desaturation           |
| -12.0364  | -C2H4+O      | Ethyl to alcohol                      |
| -14.0157  | -CH2         | Demethylation                         |
| -27.9949  | -CO          | Decarbonylation                       |
| -29.9742  | +O2+H2       | Nitro reduction                       |
| -30.0106  | -CH2O        | Hydroxymethylene loss                 |
| -44.9977  | -COOH        | Decarbonylation                       |
| +176.0321 | +C6H8O6      | Glucuronide conjugation               |
| +192.027  | +C6H8O7      | Hydroxylation+glucuronide conjugation |
| +289.0732 | +C10H15N3O5S | Glutathione conjugation               |
| -0.0364   | -CH4+O       | 2-Ethoxyl to acid                     |
| +17.9742  | -CH2+O2      | Demethylation+2*hydroxylation         |
| +15.9585  | -CH4+O2      | Ethyl to carboxylic acid              |
| +29.9742  | -H2+O2       | Quinone formation                     |

1

Table S2 10 drug prototype components detected in brain tissue after oral administration

| NO. | Component Name            | Observed m/z | Formula   | Observed t <sub>R</sub> (min) | PPM  | MS <sup>2</sup> (m/z) (neg)                  |
|-----|---------------------------|--------------|-----------|-------------------------------|------|----------------------------------------------|
| P1  | Chlorogenic acid isomer I | 353.0844     | C16H18O9  | 3.12                          | -9.6 | 191.0561,179.0351,135.0446                   |
| P2  | Chlorogenic acid          | 353.0844     | C16H18O10 | 4.23                          | -8.1 | 191.0561                                     |
| P9  | 3-O-Feruloylquinic Acid   | 367.1025     | C17H20O9  | 6.11                          | -1.2 | 353.0876,179.0351,191.0561,335.0760          |
| P20 | Rutin isomer              | 609.1413     | C27H30O16 | 7.78                          | -7   | 301.0333,300.0334,343.2118,151.0034          |
| P10 | Rutin                     | 609.14       | C27H30O16 | 8.04                          | -9.2 | 301.0333,300.0334,151.0034,431.0974          |
| P11 | Hyperoside                | 463.0878     | C21H20O12 | 8.22                          | 0.3  | 300.0334,301.0333,271.0248,178.0272          |
| P13 | Isoquercitrin             | 463.0863     | C21H20O12 | 8.62                          | -3   | 300.0334,301.0333,271.0248,255.0299,178.0272 |
| P16 | 3,5-diCQA                 | 515.1188     | C25H24O12 | 10.58                         | -0.3 | 191.0561,353.0876,335.0677,179.0351,135.0446 |
| P17 | Quercitrin                | 447.0916     | C21H20O11 | 10.91                         | -2.6 | 301.0333,300.0334                            |
| P19 | 4,5-diCQA                 | 515.1175     | C25H24O12 | 13.1                          | -2.9 | 191.0561,353.0876,335.0677,179.0351          |

2

3

4

5

Table S3 7 metabolites detected in brain tissue after oral administration

| NO. | Metabolite Name         | Formula   | m/z Found | PPM  | Observed t <sub>R</sub> (min) | MS <sup>2</sup> (m/z) (neg) | Prptotypes                  |
|-----|-------------------------|-----------|-----------|------|-------------------------------|-----------------------------|-----------------------------|
| M1  | Alcohols dehydration    | C16H16O8  | 335.077   | 0.8  | 5.56                          | 179.0351,161.0458           | Chlorogenic acid isomer I   |
| M2  | Alcohols dehydration    | C16H16O8  | 335.0767  | -0.1 | 5.84                          | 179.0351,161.0458           | Chlorogenic acid            |
| M15 | Deglucosylation         | C15H10O7  | 301.0334  | -4.8 | 7.70                          | 271.0248,255.0299           |                             |
| M16 | Deglucosylation         | C15H10O8  | 301.0336  | -4.1 | 8.18                          | 271.0248,255.0299           | Hyperoside<br>Isoquercitrin |
| M17 | Glucuronide conjugation | C27H28O18 | 639.1188  | -1.5 | 5.94                          | 300.0334,301.0333,271.0248  |                             |
| M19 | Deglucosylation         | C15H10O6  | 285.0388  | -4   | 11.22                         | 285.0392,191.0561           |                             |
| M20 | Demethylation           | C20H18O11 | 433.0766  | -1.2 | 9.22                          | 300.0334,301.0333,271.0248  | Quercitrin                  |

6

Table S4 Compound targets related to ischemic stroke disease

| metabolism type | compound name     | target symbol |
|-----------------|-------------------|---------------|
| prototype       | hyperoside        | NOS1          |
| prototype       | hyperoside        | PTGS1         |
| prototype       | hyperoside        | PTGS2         |
| prototype       | Rutin             | ALOX5         |
| prototype       | Rutin             | INS           |
| prototype       | Rutin             | IL6           |
| prototype       | Rutin             | IL1B          |
| prototype       | Rutin             | PRKCH         |
| prototype       | Rutin             | TNF           |
| prototype       | quercitrin        | PTGS2         |
| prototype       | Trifolin          | CAMKK2        |
| prototype       | Trifolin          | F7            |
| prototype       | Trifolin          | NOS1          |
| prototype       | Trifolin          | PTGS2         |
| prototype       | Scopolin          | PTGS1         |
| prototype       | Leucopelargonidin | ESR1          |
| prototype       | Leucopelargonidin | PTGS1         |
| prototype       | Leucopelargonidin | PTGS2         |
| prototype       | Cassiaside        | CAMKK2        |
| prototype       | Cassiaside        | PTGS2         |
| prototype       | Eupatin           | CAMKK2        |
| prototype       | Eupatin           | F7            |
| prototype       | Eupatin           | ESR2          |
| prototype       | Eupatin           | NOS1          |
| prototype       | Eupatin           | PTGS2         |
| prototype       | Eupatin           | VEGFA         |
| prototype       | Skimmin           | PTGS2         |
| prototype       | Genistin          | CAMKK2        |
| prototype       | Genistin          | F7            |
| prototype       | Genistin          | PTGS2         |
| prototype       | Cinchonain I b    | PTGS2         |
| prototype       | Liriodendrin      | CAMKK2        |
| prototype       | Liriodendrin      | PTGS2         |
| metabolite      | quercetin         | ALOX5         |
| metabolite      | quercetin         | ABCG2         |
| metabolite      | quercetin         | BIRC5         |
| metabolite      | quercetin         | BCL2A1        |
| metabolite      | quercetin         | CD40LG        |
| metabolite      | quercetin         | CCL2          |
| metabolite      | quercetin         | CCR2          |
| metabolite      | quercetin         | F7            |

| metabolism type | compound name | target symbol |
|-----------------|---------------|---------------|
| metabolite      | quercetin     | DUOX2         |
| metabolite      | quercetin     | HSPA1A        |
| metabolite      | quercetin     | HSPA1B        |
| metabolite      | quercetin     | ICAM1         |
| metabolite      | quercetin     | IL1A          |
| metabolite      | quercetin     | IL1B          |
| metabolite      | quercetin     | IL10          |
| metabolite      | quercetin     | IL6           |
| metabolite      | quercetin     | MMP9          |
| metabolite      | quercetin     | NF-κB         |
| metabolite      | quercetin     | MAPK1         |
| metabolite      | quercetin     | NQO1          |
| metabolite      | quercetin     | NOS1          |
| metabolite      | quercetin     | PTGS1         |
| metabolite      | quercetin     | PTGS2         |
| metabolite      | quercetin     | PRKCH         |
| metabolite      | quercetin     | SELE          |
| metabolite      | quercetin     | THBD          |
| metabolite      | quercetin     | TGFB1         |
| metabolite      | quercetin     | TNF           |
| metabolite      | quercetin     | VCAM1         |
| metabolite      | quercetin     | VEGFA         |
| metabolite      | caffeic acid  | PTGS1         |
| metabolite      | caffeic acid  | PTGS2         |

Table S5 Traced involved metabolic pathways and co-related targets

| Target Symbol | Gene Name                                           | Pathways                          |
|---------------|-----------------------------------------------------|-----------------------------------|
| ALOX5         | arachidonate 5-lipoxygenase                         | Arachidonic acid metabolism       |
| ABCG2         | ATP-binding cassette, sub-family G, member 2        | ABC transporters                  |
| BIRC5         | baculoviral IAP repeat containing 5                 | NF-κB signaling pathway           |
| BIRC5         | baculoviral IAP repeat containing 5                 | Apoptosis                         |
| BIRC5         | baculoviral IAP repeat containing 5                 | TNF signaling pathway             |
| BCL2A1        | BCL2-related protein A1                             | NF-κB signaling pathway           |
| BCL2A1        | BCL2-related protein A1                             | Apoptosis                         |
| CAMKK2        | calcium/calmodulin-dependent protein kinase 2, beta | AMPK signaling pathway            |
| CCL2          | chemokine (C-C motif) ligand 2                      | TNF signaling pathway             |
| CCL2          | chemokine (C-C motif) ligand 2                      | Chemokine signaling pathway       |
| CCR2          | chemokine (C-C motif) receptor 2                    | Chemokine signaling pathway       |
| F7            | coagulation factor VII                              |                                   |
| DUOX2         | dual oxidase 2                                      | Thyroid hormone synthesis         |
| ESR1          | estrogen receptor 1                                 | Estrogen signaling pathway        |
| ESR1          | estrogen receptor 1                                 | Thyroid hormone signaling pathway |
| ESR2          | estrogen receptor 2 (ER beta)                       |                                   |

| Target Symbol | Gene Name                             | Pathways                                         |
|---------------|---------------------------------------|--------------------------------------------------|
| HSPA1A        | heat shock 70kDa protein 1A           | Estrogen signaling pathway                       |
| HSPA1B        | heat shock 70kDa protein 1B           | Estrogen signaling pathway                       |
| INS           | insulin                               | Insulin signaling pathway                        |
| ICAM1         | intercellular adhesion molecule 1     | NF-κB signaling pathway                          |
| ICAM1         | intercellular adhesion molecule 1     | TNF signaling pathway                            |
| IL1A          | interleukin 1, alpha                  | Necroptosis                                      |
| IL1B          | interleukin 1, beta                   | NF-κB signaling pathway                          |
| IL1B          | interleukin 1, beta                   | Necroptosis                                      |
| IL1B          | interleukin 1, beta                   | Toll-like receptor signaling pathway             |
| IL1B          | interleukin 1, beta                   | IL-17 signaling pathway                          |
| IL1B          | interleukin 1, beta                   | TNF signaling pathway                            |
| IL1B          | interleukin 1, beta                   | Inflammatory mediator regulation of TRP channels |
| IL10          | interleukin 10                        | Jak-STAT signaling pathway                       |
| IL6           | interleukin 6                         | Toll-like receptor signaling pathway             |
| IL6           | interleukin 6                         | HIF-1 signaling pathway                          |
| IL6           | interleukin 6                         | Jak-STAT signaling pathway                       |
| IL6           | interleukin 6                         | TNF signaling pathway                            |
| MMP9          | matrix metalloproteinase 9            | TNF signaling pathway                            |
| MMP9          | matrix metalloproteinase 9            | IL-17 signaling pathway                          |
| MAPK1         | mitogen-activated protein kinase 1    | MAPK signaling pathway                           |
| NF-κB         | nuclear factor-kappa B                | MAPK signaling pathway                           |
| NF-κB         | nuclear factor-kappa B                | IL-17 signaling pathway                          |
| NF-κB         | nuclear factor-kappa B                | TNF signaling pathway                            |
| NF-κB         | nuclear factor-kappa B                | NF-κB signaling pathway                          |
| NQO1          | NAD(P)H dehydrogenase, quinone 1      |                                                  |
| NOS1          | nitric oxide synthase 1 (neuronal)    | Arginine and proline metabolism                  |
| PTGS1         | prostaglandin-endoperoxide synthase 1 | Arachidonic acid metabolism                      |
| PTGS2         | prostaglandin-endoperoxide synthase 2 | Arachidonic acid metabolism                      |
| PRKCH         | protein kinase C, beta                | MAPK signaling pathway                           |
| PRKCH         | protein kinase C, beta                | Calcium signaling pathway                        |
| PRKCH         | protein kinase C, beta                | T cell receptor signaling pathway                |
| PRKCH         | protein kinase C, beta                | mTOR signaling signaling pathway                 |
| PRKCH         | protein kinase C, beta                | PI3K-Akt signaling pathway                       |
| PRKCH         | protein kinase C, beta                | Wnt signaling pathway                            |
| PRKCH         | protein kinase C, beta                | VEGF signaling pathway                           |
| PRKCH         | protein kinase C, beta                | Phosphatidylinositol signaling system            |
| PRKCH         | protein kinase C, beta                | Arachidonic acid metabolism                      |
| PRKCH         | protein kinase C, beta                | Arachidonic acid metabolism                      |
| PRKCH         | protein kinase C, beta                | Arachidonic acid metabolism                      |
| SELE          | selectin E                            |                                                  |
| THBD          | thrombomodulin                        | MAPK signaling pathway                           |
| THBD          | thrombomodulin                        | PI3K-Akt signaling pathway                       |

| Target Symbol | Gene Name                            | Pathways                               |
|---------------|--------------------------------------|----------------------------------------|
| TGFB1         | transforming growth factor, beta 1   | MAPK signaling pathway                 |
| TGFB1         | transforming growth factor, beta 1   | Cytokine-cytokine receptor interaction |
| TGFB1         | transforming growth factor, beta 1   | TGF-beta signaling pathway             |
| TGFB1         | transforming growth factor, beta 1   | PI3K-Akt signaling pathway             |
| TGFB1         | transforming growth factor, beta 1   | NF-κB signaling pathway                |
| TGFB1         | transforming growth factor, beta 1   | toll-like receptor signaling pathway   |
| TNF           | tumor necrosis factor                | MAPK signaling pathway                 |
| TNF           | tumor necrosis factor                | NF-κB signaling pathway                |
| TNF           | tumor necrosis factor                | Cytokine-cytokine receptor interaction |
| TNF           | tumor necrosis factor                | AMPK signaling pathway                 |
| TNF           | tumor necrosis factor                | mTOR signaling pathway                 |
| TNF           | tumor necrosis factor                | TNF signaling pathway                  |
| TNF           | tumor necrosis factor                | PI3K-Akt signaling pathway             |
| TNF           | tumor necrosis factor                | TGF-beta signaling pathway             |
| TNF           | tumor necrosis factor                | MHC I pathway                          |
| TNF           | tumor necrosis factor                | toll-like receptor signaling pathway   |
| VCAM1         | vascular cell adhesion molecule 1    | NF-κB signaling pathway                |
| VCAM1         | vascular cell adhesion molecule 1    | MAPK signaling pathway                 |
| VEGFA         | vascular endothelial growth factor A | RAS signaling pathway                  |
| VEGFA         | vascular endothelial growth factor A | VEGF signaling pathway                 |
| VEGFA         | vascular endothelial growth factor A | MAPK signaling pathway                 |

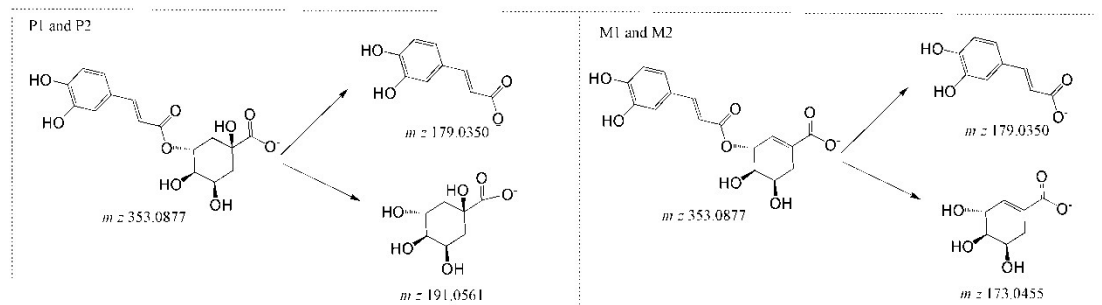

Figure S1 The proposed fragmentation pathways of Chlorogenic acid isomers and their metabolites

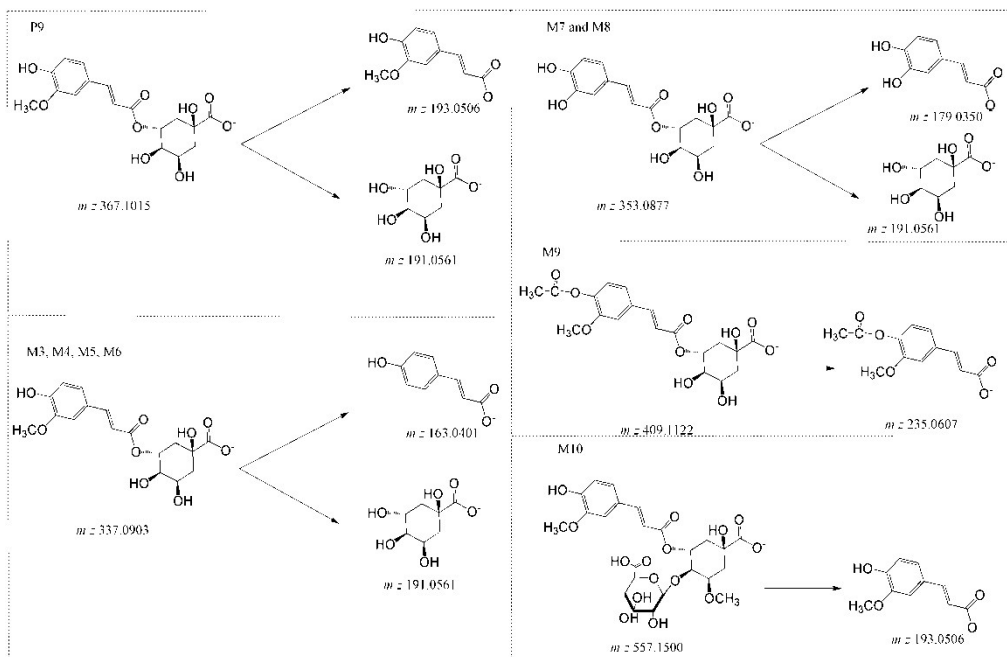

Figure S2 The proposed fragmentation pathways of 3-O-Feruloylquinic Acid (P9) and its metabolites

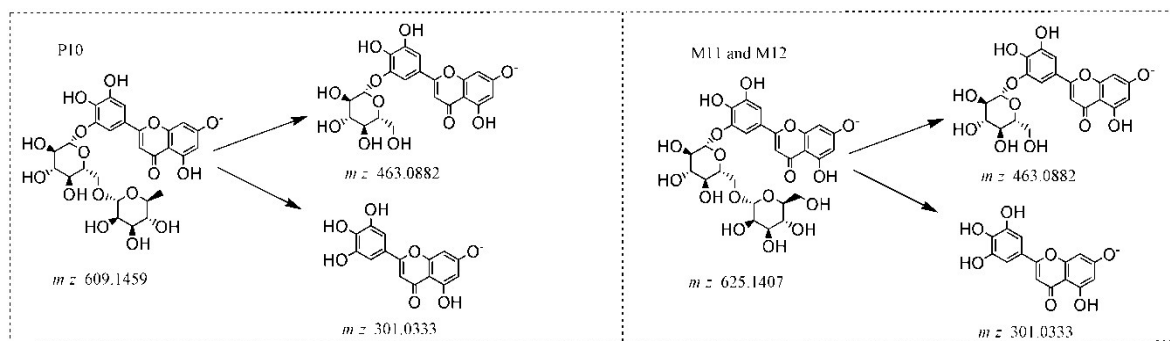

Figure S3 The proposed fragmentation pathways of Rutin (P10) and its metabolites



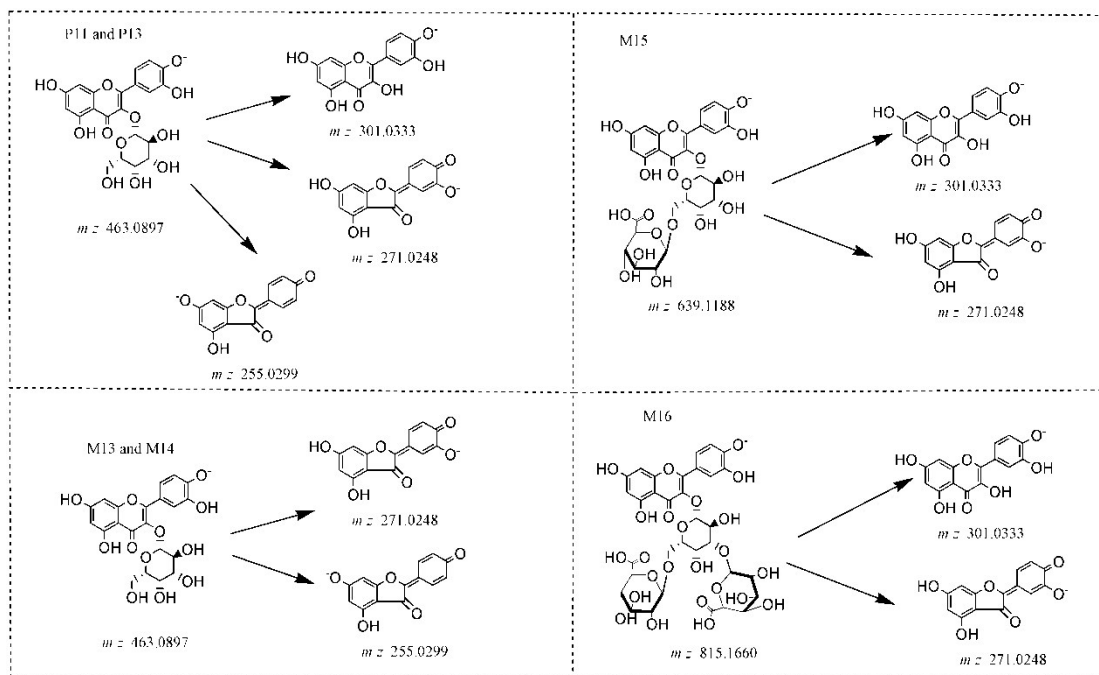

Figure S4 The proposed fragmentation pathways of Hyperoside (P11) and its metabolites

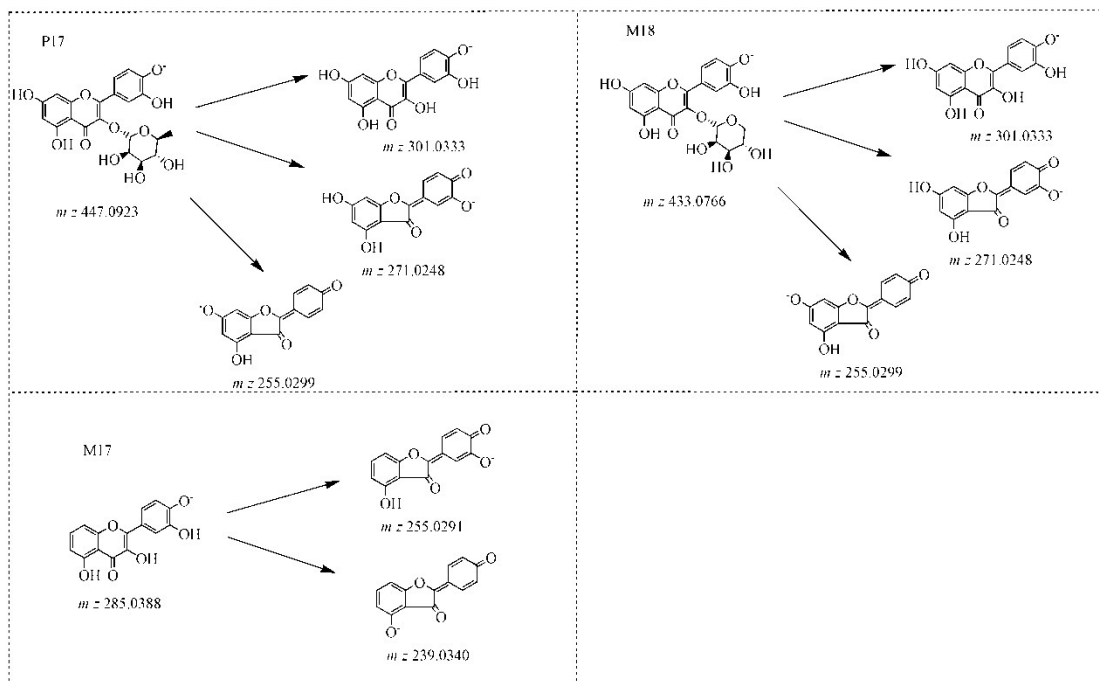

Figure S5 The proposed fragmentation pathways of Quercitrin (P17) and its metabolites
